# Supplementary material
Source: publisher site journal article supplement (https://www.dovepress.com/get_supplementary_file.php?f=appendix-2.docx)
Supplement: Supplementary file 1 [file get_supplementary_file.php]

**Appendix 2- Remedies recommended by CAM practitioners for ARTI in children**

| Aconite, Bryonia Comp (homeopathics) |
| --- |
| Adhatoda (herbal tincture/tea) |
| Amla (Indian gooseberry) (Indian herbal) |
| Andrographis (herbal tincture/tea) |
| Apple cider vinegar (food as medicine) |
| Arma Force for kids (vitamin/mineral) |
| Astragalus (herbal tincture/tea) |
| Bai He Gu Jin Tang (Chinese complex) |
| Basil (aromatherapy) |
| Beta Carotene (vitamin/mineral) |
| Beta-glucan extract (vitamin/mineral) |
| Bhrungaraj (Indian herbal) |
| Brauers (over the counter combination) (homeopathics) |
| Bromoelain (vitamin/mineral) |
| Bronchi plantargo (homeopathics) |
| Bryonia cough (homeopathics) |
| Bryonia Serum comp. (homeopathics) |
| Bryonia Spongia comp.(homeopathics) |
| Bryonium Ferrum, comp (homeopathics) |
| Calendula (herbal tincture/tea) |
| Cangz Hu Bai Zhi (Chinese complex) |
| Cha Chuan Xiong Chat Ara San (Chinese complex) |
| Chai Hu (Chinese complex) |
| Chai Hu Shu Gan Wan (Chinese complex) |
| Chamomile (herbal tincture/tea) |
| Chilli (food as medicine) |
| Chitraka (Plumbaginaceae) (Indian herbal) |
| Chuan Bai Mu (Chinese complex) |
| Cinnamon (food as medicine) |
| Cleavers (herbal tincture) |
| CPMP (celloids) |
| CS (celloids) |
| Cumin (food as medicine) |
| Daikon radish (food as medicine) |
| Echinacea (herbal tincture/tea) |
| EFA [omega 3 , Adalase, Cod liver oil ] |
| Elder flower/berry (herbal tincture/tea/syrup) |
| Elecampane (herbal tincture/tea) |
| Engystol (homeopathics) |
| Er Chen Tang (Chinese complex) |
| Er Chen Wan (Chinese complex) |
| Eucalyptus (aromatherapy) |
| Eyebright (herbal tincture/tea) |
| Fennel (tincture/tea/food as medicine) |
| Ferrum Phos Tart stib Aconite Phos comp (homeopathics) |
| Ferrum Rosatum, Aconite, China (homeopathics) |
| Ferrun Phos Aconite, the Bryonia Aconite Comp (homeopathics) |
| Formula 5, BioResearch (homeopathics) |
| Formula C (homeopathics) |
| Galangal (food as medicine) |
| Garlic and onion (oxymel) |
| Garlic (oil/ tea) |
| Ginger (powder/tea/poultice) |
| Grindelia (herbal tincture) |
| Grippe (homeopathics) |
| Honey (food as medicine) |
| Hydratis (herbal tincture/tea) |
| Hyssop (herbal tincture/tea) |
| Immune Factor Bioceuticals (vitamin/mineral) |
| Immune support combination (vitamin/mineral) |
| Iodine (vitamin/mineral) |
| IP (celloids) |
| Iron (vitamin/mineral) |
| Ivy Leaf (herbal tincture) |
| Jin Yin Hua (Chinese complex) |
| Kiwi destuff (herbal combination) |
| Lavender (aromatherapy) |
| Lemon (food as medicine) |
| Licorice (herbal tincture/tea) |
| Lui Wei (Chinese complex) |
| Lui Wei Di Huang Wan (Chinese complex) |
| Marshmallow (herbal tincture/tea) |
| Mullein (herbal tincture) |
| Mustard (herbal poultice) |
| Nutmeg (food as medicine) |
| Oats (herbal tincture/tea) |
| Olive leaf (herbal tincture) |
| Onion (food as medicine/cough syrup) |
| PCIP (celloids) |
| Pelorgonium (herbal tincture/tea) |
| Pepper (Indian herbal) |
| Peppermint (herbal tincture/tea/essential oil) |
| Phos comp tart stib (homeopathics) |
| Phosphorus (homeopathics) |
| Pineapple juice (food as medicine) |
| Piper longum (long pepper) (Indian herbal) |
| Poke root (herbal tincture) |
| Pomegranate (herbal tincture/tea) |
| Posumon [ mint, cinnamon, and dragon's blood] (aromatherapy) |
| PPMP (celloids) |
| Probiotics (lactoferrin, BabyBiotic, lactobacillus paracasei, Flora Care for Kids) |
| PS (celloids) |
| Pu Gong Yin (Chinese complex) |
| Rescue remedy (flower essence) |
| Rhodiola (herbal tincture) |
| Ribwort (herbal tincture/tea) |
| Rose (aromatherapy) |
| Rosehip (herbal tea) |
| Sage (herbal tincture/tea) |
| SCF (celloids) |
| Selenium (vitamin/mineral) |
| Silica (celloids) |
| Sitopaladi Churna (Indian herbal) |
| Slippery Elm (herbal) |
| SP (celloids) |
| Super mushroom complex (medigenics) (vitamin/mineral) |
| Talisadi Churna (Indian herbal) |
| Tea tree (aromatherapy) |
| Thuja (homeopathics) |
| Thyme (herbal tincture/tea) |
| Triphala chew (Indian herbal) |
| Tumeric (food as medicine) |
| Verbascum (herbal tincture) |
| Viburcol's a homeopathic by Heel (homeopathics) |
| Violet (herbal tincture) |
| Vitamin A (vitamin/mineral) |
| Vitamin B's (vitamin/mineral) |
| Vitamin B12 (vitamin/mineral) |
| Vitamin C [Ultra buffer C, C-Max powder Biomedica (vitamin/mineral) |
| Vitamin D or Biomedica vitamin D . Or Eagle Vitamin D spray (vitamin/mineral) |
| Vitamin E (vitamin/mineral) |
| Wild Cherry (herbal tincture) |
| Winter vapor balm from Little Innocents (aromatherapy) |
| Withania (herbal tincture) |
| Wood betony (tilia) (herbal tincture) |
| Xiao Chai Hu Tang (Chinese complex) |
| Xion Char Hu Wan (Chinese complex) |
| Xylitol (food as medicine) |
| Yang Ping (Chinese complex) |
| Yang Yin Qing Fei Tang (Chinese complex) |
| Yarrow (herbal tincture/tea) |
| YEP tea (yarrow, elderflower, peppermint herbal) |
| Yin Qiao San (Chinese complex) |
| Yin Qiao Wan (Chinese complex) |
| Zinc (MetaZinc) (vitamin/mineral) |
